An 18-yr-old gravida 1, para 0, patient was admitted to the hospital for labor and delivery. Her past medical history included bronchial asthma and ear infections. Physical examination revealed mild edema in both the lower extremities. Her blood pressure was 110/80 mmHg. She received an uneventful epidural analgesia for labor and delivery. Two days later she was discharged from the hospital. Four days later, she developed frontal headache, nausea, and vomiting. There was no obvious dural puncture during insertion of either the epidural needle or the epidural catheter. However, since multiple attempts at insertion of the needle had been made, it was felt that her headache could have resulted from an unrecognized dural puncture. Therefore, she was administered an EBP. Twelve hours later she developed three episodes of grand mal seizures. The seizures were controlled with the administration of phenobarbital and phenytoin iv. Neurological exam and laboratory evaluations were normal. The CT scan was negative; however, magnetic resonance imaging (MRI) showed partial occlusion of the sagittal sinus. An EEG revealed focal slowing in the right frontal and temporal regions. Her blood clotting studies were within normal limits. The patient was then administered low-dose heparin. Six days later she was completely normal. She was advised to take the antiseizure medications for another 6 weeks.

Puerperal cerebral venous thrombosis was initially reported in 1962.<sup>2</sup> Since then several case reports have been published in several journals. It is characterized by the occurrence of severe generalized headaches in postpartum patients in 2–7 days following delivery. Rarely, it can occur during pregnancy or during labor and delivery. The headache may be followed by seizures and or focal neurological changes. The incidence is about 1 in 3000 pregnancies. It is believed that the pathogenesis of this entity is from the venous stasis, endothelial damage, and increased coagulable state that exists during the peripartum period. In some reports, some of these patients with CVT had received regional analgesias. Two of those patients had also been given EBP as they were thought to have had spinal headaches.\* However, many more cases of CVT have occurred in patients who did not receive regional analgesia.<sup>3</sup> Fortunately, most of these patients improve significantly in a short period of time perhaps due to recanalization of the thrombosed vein.

\* Gewirtz EC, Costin MC, Marx GF: Cortical vein thrombosis may mimic postdural puncture headache. *Reg Anesth* 12:188–190, 1987.

Anesthesiology  
71:479, 1989

*In Reply:*—We would like to thank Drs. Ravindran and Zandstra for adding cerebral venous thrombosis (CVT) to the differential diagnosis of postpartum seizures.

We would recommend (and feel that Drs. Ravindran and Zandstra would agree) that the diagnosis of CVT should be entertained when an epidural blood patch (EBP) does not relieve symptoms of what was thought to be postlumbal puncture headache that, in turn, may have presented with atypical symptoms.

Common symptoms of CVT include sudden onset of a severe headache, vomiting, focal neurologic deficits, and seizures but not hypertension.<sup>1</sup> In our patient,<sup>2</sup> vomiting and neurologic deficits were absent and hypertension (presumably PIH) was conspicuously present. Our retrospective diagnosis of our patient's seizures was one of eclampsia.

It was not the intention of our report to infer that EPB or caffeine sodium benzoate (CSB) frequently cause postpartum seizures. In fact, we presented no evidence to suggest that the seizures were other than temporally related to the EBP. However, one question we attempted to raise was, given the presumed diagnosis of PIH, could the admin-

If a postpartum patient who may have received spinal or epidural analgesia for delivery of tubal ligation presents with a headache, an anesthesiologist is more likely to think of it as "spinal headache." In the early stages it is very difficult to distinguish the headache of CVT from that of low-pressure spinal headache; however, there are some distinguishing features. With CVT, the headache may be more diffuse in location. It may not be associated with auditory symptoms. Usually, these patients are somewhat lethargic. The intensity of the headache does not vary significantly with the change of position of the patient. CT scan is generally negative. However, contrast CT scan or MRI may show evidence of CVT.

Reading through the clinical report of Bolen *et al.* one may get the misimpression that the use of CSB or EBP may have initiated the seizure in their patient. Based on our experience and our review of this entity, we feel that this may have been a case of CVT. Furthermore, Bolen *et al.* point out that their patient's headache was not typical of the spinal headache. In most of the reported cases of CVT the CT scans have been negative. The CSB had been administered several hours prior to the occurrence of the seizures. Until we have more definite evidence, the technique of EBP, or the use of CSB to treat spinal headache, should not be viewed as the cause of seizures in postpartum patients.

RAM S. RAVINDRAN, M.D.  
GREGORY C. ZANDSTRA, M.D.

*Department of Anesthesia  
Indiana University Medical Center  
Indianapolis, Indiana 46202*

#### REFERENCES

1. Bolton VE, Leicht CH, Scanlon TS: Postpartum seizure after epidural blood patch and intravenous caffeine sodium benzoate. *ANESTHESIOLOGY* 70:146–149, 1989
2. Lorincz AB, Moore RY: Puerperal cerebral venous thrombosis. *Am J Obstet Gynecol* 83:311–318, 1962
3. Srinivasan K: Cerebral venous thrombosis in pregnancy and puerperium. *Angiology* 34:731–746, 1983

(Accepted for publication May 23, 1989.)

istration of intravenous CSB to a parturient reduce the seizure threshold or unmask a seizure disorder.

CRAIG H. LEICHT, M.D., M.P.H.  
*Director, Obstetric Anesthesia*  
THOMAS S. SCANLON, M.D.  
*Chairman, Anesthesiology*  
*Naval Hospital*  
*San Diego, California 92134–5000*

#### REFERENCES

1. Burrow GN, Ferris TF: *Medical Complications During Pregnancy*. Philadelphia, W. B. Saunders, 1988
2. Bolton VE, Leicht CH, Scanlon TS: Postpartum seizure after epidural blood patch and intravenous caffeine sodium benzoate. *ANESTHESIOLOGY* 70:146–149, 1989

(Accepted for publication May 23, 1989.)
